# Supplementary material
Source: publisher figshare collection journal article supplement (https://acs.figshare.com/ndownloader/files/4062601)
Supplement: Supplementary file 1 [file 4062601]

## SUPPORTING INFORMATION

### A Mechanistic Study of Methanol Decomposition and Oxidation on Pt(111)

Alexander V. Miller,<sup>1</sup> Vasily V. Kaichev,<sup>1,2,\*</sup> Igor P. Prosvirin,<sup>1</sup> Valerii I. Bukhtiyarov<sup>1,2</sup>

<sup>1</sup>*Boriskov Institute of Catalysis, Lavrentieva ave. 5, Novosibirsk 630090, Russia*

<sup>2</sup>*Novosibirsk State University, Pirogova str. 2, Novosibirsk 630090, Russia*

To determine the coverage ( $\theta$ ) of platinum surface by different carbon-containing species (like C, CO, HCOO), we used the method based on a comparison of the *C1s* peak intensity normalized to the *Pt4f* peak intensity with that obtained at a reference point. As the reference point, the relative intensity of the *C1s* spectrum of the Pt(111) surface obtained *in situ* under  $2 \times 10^{-3}$  mbar CO at 320 K was used. According to the published data,<sup>1</sup> under these conditions, a saturated CO coverage near 0.62 ML is formed (1 ML equals the density of Pt atoms in the (111) plane;  $1.5 \times 10^{15}$  atom/cm<sup>2</sup>).

Since the coverage of carbon-containing species during the methanol decomposition and oxidation is low ( $\theta$  is about 1 ML), it is possible to ignore the XPS signal attenuation in the adsorbate layer. Accordingly, the calculations were carried out using the Fadley's equation<sup>2</sup> derived specially for the case of a semi-infinite substrate with a non-attenuating overlayer at fractional monolayer coverage. The Fadley's overlayer/substrate ratio is as follows:

$$\frac{N_l(\alpha)}{N_k(\alpha)} = \frac{\Omega_0(E_l) \cdot A_0(E_l) \cdot D_0(E_l) \cdot s' \cdot \frac{d\sigma_l}{d\Omega} \cdot d}{\Omega_0(E_k) \cdot A_0(E_k) \cdot D_0(E_k) \cdot s \cdot \frac{d\sigma_k}{d\Omega} \cdot \Lambda_e(E_k) \cdot \sin \alpha} \quad (\text{S1})$$

where  $N_l(\alpha)$  and  $N_k(\alpha)$  are photoelectron peak intensities measured at a fixed take off angle  $\alpha$ ; the peak  $k$  is from substrate; the peak  $l$  is from overlayer;  $\Omega_0$  is an effective solid angle;  $A_0$  is an effective specimen area;  $D_0$  is an instrument detection efficiency;  $s'$  is the mean surface density of atoms, in which the peak  $l$  originates;  $s$  is the mean surface density of the substrate;  $\frac{d\sigma}{d\Omega}$  is the differential photoelectric cross-section;  $d$  is the mean separation between layers of density  $s$  in the substrate;  $\Lambda_e(E_k)$  is an attenuation length in the substrate.

---

\* To whom correspondence should be addressed, [yvk@catalysis.ru](mailto:yvk@catalysis.ru).

The value  $s'/s$  is identically equal to the fractional monolayer coverage of the adsorbed species in which peak  $l$  originates. Correspondingly, the coverage of platinum surface by different carbon-containing species can be obtained by transformation of the equation (S1):

$$\theta = \frac{N_l(\alpha) \cdot \Omega_0(E_k) \cdot A_0(E_k) \cdot D_0(E_k) \cdot \frac{d\sigma_k}{d\Omega} \cdot \Lambda_e(E_k) \cdot \sin \alpha}{N_k(\alpha) \cdot \Omega_0(E_l) \cdot A_0(E_l) \cdot D_0(E_l) \cdot \frac{d\sigma_l}{d\Omega} \cdot d} = K \cdot \frac{N_l(\alpha)}{N_k(\alpha)} \quad (\text{S2})$$

where  $N_l(\alpha)/N_k(\alpha) = \int C1s / \int Pt4f$  calculated for each components in the  $C1s$  spectrum. To determine the constant  $K$ , we used the reference point, that is saturated  $CO$  coverage observed on Pt(111) under  $2 \times 10^{-3}$  mbar  $CO$  at 320 K. It was shown previously<sup>1</sup> that the coverage is approximately equal  $0.62 \pm 0.02 ML$  under these conditions.

It should be noted that taking into account the XPS signal attenuation in the adsorbate overlayer leads to a change of calculated  $\theta$  values in the range  $\pm 2\%$  only.

[1] Ertl, G.; Neumann, M.; Streit, K. M. Chemisorption of CO on the Pt(111) Surface. *Surf.*

*Sci.* **1977**, *64*, 393–410.

[2] Fadley, C. S. Basic Concepts of X-ray Photoelectron Spectroscopy. *Electron Spectroscopy:*

*Theory, Techniques and Applications.* **1978**, *2*, 2–156.

This information is available free of charge via the Internet at <http://pubs.acs.org>.
